# Supplementary material for: Transcriptional Profiling of Breast Cancer Metastases Identifies Liver Metastasis–Selective Genes Associated with Adverse Outcome in Luminal A Primary Breast Cancer
Source: Oxford University Press journal article supplement (doi:10.1158/1078-0432.ccr-15-0487), 2015-08-14
Supplement: 10780432ccr150487-sup-145971_1_supp_3036327_nqk409.xlsx [file 10780432ccr150487-sup-145971_1_supp_3036327_nqk409.xlsx]

## Sheet: Supplementary Table 2
Supplementary Table 2: Genes differential expressed between liver metastases compared to other metastatic sites. Two class SAM analyses was performed within the subset of ER positive tumors using the site (liver versus other) of metastasis as supervising variable. Genes were considered significant at FDR=0.1.
Up-regalated genes					Down-regulated genes
Sequence	Gene symbol	Fold change	qvalue		Sequence	Gene symbol	Fold change	qvalue
NM_002303	LEPR	3.9883	0		NM_022716	PRRX1	14.4702	0
NM_014079	KLF15	3.02839	0		AY339060	MFAP5	8.34732	0.00872857
NM_019856	MYOM1	3.31488	0		AK123757	EBF1	6.38832	0.00872857
ENST00000317391	GLYATL1	2.80107	0		X81334	MMP13	13.4629	0.00872857
BC139840	UPB1	3.66265	0		AK225968	PRRX1	6.36517	0.00872857
BC035719	A1BG	4.3676	0		NM_004684	SPARCL1	7.47745	0.00872857
AA992031	SRD5A2	4.11237	0		AY513278	SPARCL1	9.32983	0.0113656
BC108676	TMEM195	5.63102	0		NM_003013	SFRP2	30.9898	0.0137473
NM_153675	FOXA2	3.23566	0		NM_001797	CDH11	3.95742	0.0137473
NM_031457	MS4A8B	4.03968	0		BC067522	MMP13	11.4571	0.0137473
NM_003725	HSD17B6	5.16198	0		NM_002427	MMP13	13.416	0.018412
NM_022436	ABCG5	3.6858	0		NM_006884	SHOX2	2.95073	0.0255129
AK094150	CAPN5	3.47525	0		CK821126	MXRA5	6.00822	0.0274058
NM_001003680	LEPR	4.05857	0		NM_003248	THBS4	13.8519	0.0274058
BC041656	BCO2	4.27548	0		ENST00000389086	FBN1	4.9912	0.0274058
NM_001014975	CFH	3.97448	0		BM754248	FBN1	4.58047	0.0333169
BC069666	CYP2C18	5.65456	0		NM_015419	MXRA5	5.06392	0.0333169
NM_000348	SRD5A2	4.06153	0		BU624633	PRRX1	3.39517	0.0371401
ENST00000382167	FAM99A	8.18654	0		NM_001848	COL6A1	4.40911	0.0371401
ENST00000370263	CHRNA4	5.60391	0		BC032828	SFRP4	6.12078	0.0371401
NM_000064	C3	2.91645	0		NM_013989	DIO2	9.77991	0.0371401
BG616989	SERPINA1	2.58471	0		BC098380	NETO2	3.69014	0.0368382
NM_201648	GLYAT	6.6298	0		NM_002048	GAS1	10.2656	0.0401377
NM_013389	NPC1L1	4.46267	0		AK096708	EBF1	3.47868	0.0475592
NM_001002236	SERPINA1	2.79241	0		NM_018092	NETO2	3.43054	0.05243
AI695259	UPP2	9.12298	0		NM_021238	FAM60A	1.99756	0.05243
NM_000047	ARSE	5.52743	0		NM_020724	RNF150	3.42134	0.0532319
NM_005950	MT1G	2.54377	0		NM_001993	F3	3.03974	0.0576876
NM_001014975	CFH	4.27507	0		BC008666	SFRP2	12.5439	0.0576876
NM_018245	OGDHL	3.59057	0		NM_001855	COL15A1	4.08195	0.061428
NM_000765	CYP3A7	9.15131	0		NM_004850	ROCK2	2.07902	0.0643312
CK724900	CDH2	9.94859	0		NM_005202	COL8A2	2.44526	0.0643312
NM_006149	LGALS4	14.6907	0		NM_024007	EBF1	3.53658	0.0684826
DA638957	CYP2C8	4.61193	0		BQ773742	NTRK2	16.7141	0.0684826
NM_012435	SHC2	2.75172	0		NM_015719	COL5A3	3.56153	0.0684826
NM_006841	SLC38A3	3.62187	0		NM_003014	SFRP4	5.24127	0.0684826
NM_000689	ALDH1A1	4.09456	0		BC000024	FAM60A	1.97804	0.0684826
NM_001353	AKR1C1	3.42656	0		BX641111	TNC	4.78309	0.0684826
NM_000204	CFI	3.59692	0		NM_003480	MFAP5	6.73399	0.0732065
NM_001002235	SERPINA1	3.14118	0		AY358564	CRISPLD1	12.9273	0.0732065
BG568251	CPS1	4.06247	0		NM_001025266	C3orf70	5.17119	0.0732065
S42303	CDH2	6.49449	0		AK056567	HOXA3	6.21042	0.0732065
NM_017614	BHMT2	6.56862	0		AK226074	COL1A2	3.21589	0.0732065
NM_001017366	C4BPB	6.05598	0		ENST00000380964	FBN1	3.34796	0.0732065
NM_019101	APOM	6.12677	0		NM_004530	MMP2	3.09509	0.0775786
NM_031265	MUPCDH	5.57913	0		CF454950	GPM6B	3.40879	0.0775786
NM_020998	MST1	3.7085	0		NM_001007097	NTRK2	16.517	0.0775786
NM_021175	HAMP	4.47724	0		NM_022658	HOXC8	2.32579	0.0816191
BG564643	AOX1	4.90127	0		L34056	CDH11	3.35984	0.0816191
AY317138	CPS1	3.65623	0		NM_006419	CXCL13	6.88267	0.0816191
NM_017888	ACSM5	5.97983	0		BC039006	DPYSL3	4.35983	0.0816191
NM_000106	CYP2D6	4.23476	0		NM_153715	HOXA10	4.82723	0.0816191
NM_005651	TDO2	5.5827	0		NM_001423	EMP1	2.24771	0.0816191
NM_001385	DPYS	5.41142	0		NM_006486	FBLN1	3.01736	0.0855097
NM_021969	NR0B2	5.38673	0		NM_000237	LPL	4.93381	0.0855097
CB114160	ALDH1A1	4.43262	0		NM_000396	CTSK	4.34606	0.0855097
CD608127	PLG	9.54561	0		NM_003881	WISP2	3.96525	0.0871135
NM_173355	UPP2	16.4175	0		NM_080629	COL11A1	7.61065	0.0871135
NM_001735	C5	5.03927	0		CD517635	SFRP4	3.83851	0.0871135
NM_001792	CDH2	6.78172	0		NM_000165	GJA1	3.57327	0.0996001
AW195796	HNF4A	8.85625	0		AK001584	SPON1	4.33719	0.0996001
NM_001099431	CLEC1B	4.16365	0		NM_004797	ADIPOQ	6.71534	0.0996001
NM_052971	LEAP2	5.97199	0		NM_032532	FNDC1	4.22448	0.0996001
L26985	CYP3A5	9.10762	0		BX108677	RUNX2	2.99319	0.0996001
NM_052890	PGLYRP2	6.47327	0		AK021531	COL3A1	4.32636	0.0996001
NM_018713	SLC30A10	6.39562	0		NM_001442	FABP4	6.22348	0.0996001
X55675	TAT	5.85772	0		NM_002257	KLK1	6.927	0.0996001
AK095461	VNN1	7.43962	0		ENST00000370090	COL11A1	7.84511	0.0996001
NM_170771	ALDH8A1	5.61083	0
NM_003227	TFR2	6.27423	0
NM_017614	BHMT2	8.75824	0
DQ893947	PROC	5.34379	0
M16967	F5	7.28074	0
NM_000353	TAT	6.24548	0
NM_012190	ALDH1L1	9.59784	0
NM_001486	GCKR	6.72314	0
ENST00000367796	F5	7.2062	0
NM_000772	CYP2C18	10.7405	0
NM_173054	RELN	7.6913	0
BC031412	HABP2	5.77261	0
NM_006610	MASP2	6.67463	0
NM_013391	DMGDH	8.58037	0
AK222815	AGT	5.96409	0
H77941	GLYAT	8.73323	0
NM_001801	CDO1	7.84531	0
NM_000277	PAH	7.68676	0
NM_003122	SPINK1	10.6043	0
NM_000458	HNF1B	14.0067	0
NM_016327	UPB1	7.45181	0
NM_152637	METTL7B	6.11383	0
BT006851	AGT	7.59123	0
NM_000277	PAH	6.88097	0
AV653866	ADH1B	7.63426	0
NM_002083	GPX2	7.35959	0
NM_005838	GLYAT	15.2083	0
NM_001671	ASGR1	5.92834	0
NM_000029	AGT	6.60475	0
NM_000761	CYP1A2	17.4125	0
NM_213652	HFE2	9.91604	0
NM_021232	PRODH2	9.12355	0
NM_001159	AOX1	6.25415	0
BG191723	CYP2C9	14.536	0
NM_000130	F5	8.64411	0
NM_001075	UGT2B10	13.2174	0
NM_004139	LBP	4.32854	0
NM_139208	MASP2	13.2981	0
NM_003122	SPINK1	12.0994	0
NM_022437	ABCG8	6.77383	0
BC065270	APOC2	5.13259	0
BC031412	HABP2	9.43127	0
M61853	CYP2C18	15.1766	0
X03350	ADH1B	8.12609	0
NM_004666	VNN1	9.03296	0
NM_152435	AMDHD1	6.16478	0
NM_152404	UGT3A1	12.0679	0
NM_000613	HPX	9.02152	0
NM_006657	FTCD	9.7667	0
NM_000236	LIPC	10.9017	0
NM_000483	APOC2	6.52638	0
NM_005835	SLC17A2	13.4136	0
NM_020384	CLDN2	23.1868	0
H66320	BHMT2	8.88349	0
NM_007193	ANXA10	9.80463	0
NM_004944	DNASE1L3	7.38648	0
NM_005122	NR1I3	6.85438	0
NM_017625	ITLN1	3.05013	0
BC005395	HPX	8.23848	0
NM_006657	FTCD	10.6649	0
NM_001646	APOC4	10.0519	0
DB350349	SLC22A3	17.9635	0
NM_000892	KLKB1	13.4339	0
ENST00000361503	CES4	7.94723	0
NM_181755	HSD11B1	16.0473	0
AV648327	CES4	8.12116	0
NM_000934	SERPINF2	9.06117	0
NM_000312	PROC	12.9449	0
NM_001005783	HAO2	18.0681	0
NM_001010845	ACSM2A	13.0898	0
NM_004683	RGN	14.3887	0
NM_001875	CPS1	6.45728	0
NM_000483	APOC2	9.25285	0
NM_000777	CYP3A5	13.7823	0
NM_005835	SLC17A2	16.3809	0
AF202890	APOA5	17.6326	0
NM_000429	MAT1A	11.2621	0
NM_145202	PRAP1	23.7508	0
NM_031479	INHBE	12.4076	0
NM_052968	APOA5	15.1251	0
NM_015837	FCN2	9.69449	0
NM_014375	FETUB	31.3689	0
NM_016518	PIPOX	13.3231	0
NM_182617	ACSM2B	18.9715	0
NM_015837	FCN2	10.3209	0
NM_031479	INHBE	11.7473	0
NM_005894	CD5L	13.0884	0
M63014	PON1	30.9308	0
NM_002302	LECT2	14.6213	0
NM_000030	AGXT	14.4253	0
NM_002864	PZP	25.3559	0
BC093670	LECT2	16.863	0
AV694947	AMBP	10.4745	0
M63013	PON1	31.4848	0
NM_001080513	CPN2	14.3245	0
J05064	C6	33.9891	0
BI598863	RBP4	22.4327	0
NM_000773	CYP2E1	15.1027	0
NM_153320	SLC22A7	19.0412	0
BC033586	CD5L	15.3086	0
NM_001080513	CPN2	15.3773	0
NM_001100607	SERPINA10	20.8082	0
NM_152635	OIT3	8.3835	0
NM_000457	HNF4A	42.8224	0
NM_003057	SLC22A1	22.5389	0
NM_000770	CYP2C8	17.2302	0
NM_001100607	SERPINA10	20.8539	0
NM_004132	HABP2	15.5581	0
AY358908	PRAP1	31.5082	0
NM_001181	ASGR2	15.8334	0
NM_000778	CYP4A11	42.8976	0
NM_016186	SERPINA10	21.4309	0
NM_003963	TM4SF5	22.9811	0
NM_002591	PCK1	34.5759	0
BE464047	ALDOB	21.4217	0
AU076707	FGB	33.264	0
NM_001818	AKR1C4	35.0622	0
NM_002591	PCK1	29.7932	0
BC074771	ADH1C	27.3795	0
NM_145740	GSTA1	23.2142	0
NM_020995	HPR	26.1759	0
CR749404	ITIH4	16.1822	0
AK091997	ABCG5	28.5423	0
NM_000354	SERPINA7	35.4643	0
NM_006512	SAA4	21.91	0
NM_000065	C6	48.4126	0
NM_001063	TF	24.6817	0
AV656395	ALDOB	27.5258	0
NM_002215	ITIH1	35.0411	0
NM_000771	CYP2C9	37.3373	0
NM_006744	RBP4	44.1498	0
NM_000778	CYP4A11	81.0699	0
DA631958	ALDOB	41.7599	0
BJ996964	SERPINA2	24.5263	0
T73729	FGA	37.064	0
NM_016413	CPB2	49.0605	0
NM_000066	C8B	32.4438	0
NM_000488	SERPINC1	55.5031	0
CB115674	AMBP	48.5414	0
BG566995	FGA	52.3281	0
NM_001633	AMBP	35.8053	0
NM_000301	PLG	67.464	0
NM_001639	APCS	50.0137	0
NM_004391	CYP8B1	94.1298	0
NM_003665	FCN3	20.1306	0
NM_177550	SLC13A5	34.223	0
NM_000506	F2	52.9042	0
NM_000371	TTR	70.8532	0
NM_000771	CYP2C9	128.582	0
BG618823	ALB	48.0276	0
NM_000715	C4BPA	46.7099	0
DB185572	ALB	50.8762	0
NM_002216	ITIH2	17.7025	0
NM_001622	AHSG	112.259	0
DC354601	FGA	79.6024	0
AV656346	ALB	47.2352	0
BC007058	APCS	65.1941	0
AV659083	ALB	47.2284	0
NM_000477	ALB	113.012	0
BC106760	FGB	36.1368	0
NM_000039	APOA1	82.6237	0
NM_002150	HPD	88.2484	0
NM_004467	FGL1	78.8886	0
AY960291	ALB	35.7441	0
DQ891414	ALB	34.172	0
AF119840	ALB	34.3925	0
NM_005141	FGB	30.2529	0
AI174982	FGB	36.2522	0
AK222757	ITIH3	80.5383	0
BX346132	C8A	105.715	0
U22961	ALB	42.5435	0
NM_000562	C8A	131.562	0
AV645562	ALB	40.432	0
NM_000567	CRP	105.747	0
NM_000035	ALDOB	105.259	0
NM_002217	ITIH3	101.327	0
NM_000508	FGA	152.267	0
NM_000040	APOC3	136.947	0
NM_000384	APOB	166.428	0
NM_000567	CRP	257.493	0
NM_021871	FGA	350.001	0
NM_021871	FGA	358.89	0
NM_015267	CUX2	3.94743	0.00313498
AF257473	BHMT2	3.78386	0.0031466
NM_017564	STAB2	3.85309	0.0031466
NM_002644	PIGR	4.66057	0.00317008
AB180934	CPS1	2.95325	0.00318195
NM_032954	MLXIPL	3.28591	0.00318195
DQ269985	AKR1C3	2.31686	0.00318195
BU902023	ALDH1A1	3.14136	0.00321811
ENST00000357168	TCL6	4.81181	0.00323034
NM_006774	INMT	1.71736	0.00324267
NM_000927	ABCB1	4.1515	0.00324267
NM_002108	HAL	2.8536	0.00326762
BG617627	PAH	4.57456	0.00328023
ENST00000334708	SERPINA11	3.68761	0.00328023
BC020710	HSD17B6	4.98961	0.00328023
NM_032952	MLXIPL	3.10542	0.00328023
NM_032953	MLXIPL	3.07009	0.00333169
NM_201651	SLC28A1	3.9071	0.00333169
NM_052972	LRG1	3.06237	0.00335803
NM_002153	HSD17B2	1.4053	0.00335803
NM_004055	CAPN5	3.38407	0.00604684
NM_032951	MLXIPL	2.97344	0.00606843
NM_031481	SLC25A18	2.91018	0.00606843
NM_018849	ABCB4	3.71834	0.00611209
AB075840	SHROOM1	2.49315	0.00613416
ENST00000298115	CLDN2	6.37278	0.00613416
NM_000379	XDH	2.45919	0.00617877
NM_000492	CFTR	5.14907	0.00617877
AK093840	ADCY5	2.80459	0.00622403
AF003341	ALDH1A1	3.06754	0.00624692
NM_001011547	SLC5A9	2.81591	0.00872857
ENST00000264613	CP	2.56288	0.00872857
AK098381	ADCY5	3.08585	0.00872857
NM_024539	RNF128	2.59549	0.00897444
NM_002089	CXCL2	1.70428	0.00897444
NM_138424	KIF12	2.39648	0.00903809
NM_000505	F12	2.625	0.0101486
NM_018242	SLC47A1	4.00094	0.0113656
AI918006	UBXN10	2.12601	0.0113656
NM_021902	FXYD1	4.18835	0.0114808
NM_005518	HMGCS2	2.08299	0.0114808
BQ277651	CDH2	7.71814	0.0115589
ENST00000366958	PROX1	3.66974	0.013882
AK095290	CP	2.46149	0.0139276
NM_025130	HKDC1	3.85215	0.0139276
AK021717	ONECUT2	5.50217	0.0140195
NM_004852	ONECUT2	4.10373	0.0140659
AK225360	SLC47A1	3.78287	0.0140659
NM_000624	SERPINA5	2.89557	0.0140659
NM_182983	HPN	2.20918	0.016234
NM_006774	INMT	1.56878	0.016234
NM_000683	ADRA2C	2.30148	0.016234
J02639	SERPINA5	2.82292	0.016234
BC108925	ONECUT2	3.19464	0.0164435
NM_001482	GATM	2.33116	0.018412
NM_000078	CETP	2.85041	0.018412
AA287725	YPEL2	2.42009	0.018412
NM_001082971	DDC	1.79752	0.018412
NM_006843	SDS	1.90588	0.0187015
NM_002885	RAP1GAP	2.14481	0.0187605
DQ891467	CYP4F11	2.76564	0.0187605
NM_001033083	PBLD	2.94623	0.0187605
NM_001645	APOC1	2.31736	0.0207849
NM_001077242	DEPDC7	4.11919	0.0208486
NM_153281	HYAL1	3.45326	0.0208486
NM_003708	RDH16	4.30811	0.0208486
NM_003044	SLC6A12	1.90575	0.0219497
NM_020407	RHBG	2.32643	0.0219497
NM_139053	EPS8L3	10.8872	0.0254366
NM_004067	CHN2	2.53994	0.0255129
AF373290	ABCA6	2.73103	0.0255129
NM_021187	CYP4F11	2.17976	0.0255129
NM_001738	CA1	3.89213	0.0273257
NM_004914	RAB36	2.15687	0.0274058
CB157200	DPYS	2.79467	0.0274058
NM_003748	ALDH4A1	1.87213	0.0274058
NM_001075098	MOCS1	2.2019	0.0274058
NM_004497	FOXA3	2.31994	0.0306929
NM_016593	CYP39A1	3.31766	0.0306929
NM_002899	RBP1	3.85765	0.0306929
NM_001710	CFB	1.97174	0.0306929
NM_022481	ARAP3	2.63576	0.0318287
NM_014723	SNPH	3.52874	0.0333169
H04828	MRO	2.16027	0.0335992
CB305605	TMC5	2.45688	0.0335992
NM_138413	C10orf65	2.33202	0.0335992
BM982488	C9orf68	2.02207	0.0335992
NM_052947	ALPK2	2.10686	0.0335992
NM_004613	TGM2	1.62648	0.0335992
NM_018487	TMEM176A	2.70101	0.0335992
NM_080284	ABCA6	2.97529	0.0368382
NM_020980	AQP9	2.38357	0.0368382
CA439692	GALNT5	5.77404	0.0371401
NM_152376	UBXN10	1.79946	0.0371401
NM_024080	TRPM8	2.643	0.0371401
BC127924	YPEL2	2.36322	0.0371401
NM_024764	CATSPERB	2.13594	0.0371401
NM_001004303	C1orf168	2.97255	0.0401377
NM_014945	ABLIM3	1.98985	0.0401377
ENST00000381414	TMC5	2.42886	0.0401377
NM_001003679	LEPR	2.28259	0.0401377
NM_145230	ATP6V0E2	1.86511	0.0401377
NM_183240	TMEM37	2.49012	0.0401377
NM_033439	IL33	1.50546	0.0401377
NM_013261	PPARGC1A	2.38042	0.0401377
NM_001097642	GJB1	2.87448	0.0401377
BG545667	CFB	1.85664	0.0401377
NM_000459	TEK	1.79271	0.0401377
NM_000460	THPO	2.52155	0.0421463
NM_012254	SLC27A5	2.91275	0.0421463
NM_180991	SLCO4C1	2.18695	0.0435682
NM_005946	MT1A	1.88466	0.0435682
NM_000478	ALPL	3.75211	0.0435682
NM_006287	TFPI	2.49432	0.0435682
AA887211	ABCB1	3.22278	0.0435682
D12502	CEACAM1	2.59745	0.0435682
XM_001127131	NUDT7	1.84498	0.0435682
AF016535	ABCB1	2.5386	0.0475592
AK128370	CD160	3.57895	0.0475592
NM_080866	SLC22A9	3.04428	0.05243
NM_000055	BCHE	0.730488	0.05243
NM_153609	TMPRSS6	2.38518	0.0532319
NM_144669	GLT1D1	4.10516	0.0576876
NM_005622	ACSM3	2.32665	0.0576876
NM_177553	GAS2	2.25441	0.0576876
NM_006633	IQGAP2	2.19308	0.0576876
AW162846	CAMK2N1	1.94719	0.061428
NM_000313	PROS1	1.82423	0.061428
CA426602	LRRC6	1.93082	0.0643312
ENST00000340619	C6orf123	2.38969	0.0643312
NM_057157	CYP26A1	3.53482	0.0643312
NM_003853	IL18RAP	3.49639	0.0643312
NM_000187	HGD	2.37447	0.0643312
NM_005585	SMAD6	1.77316	0.0643312
NM_007101	SARDH	2.11579	0.0684826
BQ934712	NAV2	1.76902	0.0684826
CA426834	GPR173	4.00606	0.0684826
NM_183247	TMPRSS4	4.95304	0.0684826
NM_022129	PBLD	2.15886	0.0684826
BU852892	IQGAP2	2.13474	0.0684826
NM_033049	MUC13	6.23798	0.0732065
NM_032385	C5orf4	1.41986	0.0732065
NM_006033	LIPG	2.27262	0.0732065
NM_001035223	RGL3	1.7786	0.0732065
NM_000623	BDKRB2	1.86838	0.0732065
BC009968	ARAP3	2.43464	0.0732065
BC021281	ABCG2	1.65748	0.0732065
NM_007127	VIL1	2.9947	0.0757527
NM_004753	DHRS3	1.57117	0.0757527
NM_032211	LOXL4	1.50912	0.0775786
BE139685	GAB2	7.36348	0.0775786
NM_013267	GLS2	2.12346	0.0775786
NM_001085	SERPINA3	1.76338	0.0816191
NM_006691	LYVE1	1.21234	0.0816191
NM_000300	PLA2G2A	0.8453	0.0816191
NM_017899	TESC	2.89334	0.0855097
NM_001044370	MPPED1	3.66603	0.0871135
NM_005103	FEZ1	1.81916	0.0871135
CR597062	BAALC	2.58223	0.0871135
ENST00000366558	KMO	2.41904	0.0871135
XM_930598	HGD	2.01858	0.0871135
NM_178507	OAF	1.90788	0.0871135
NM_032880	IGSF21	1.80303	0.0871135
NM_002863	PYGL	2.02624	0.0871135
X05014	CA1	3.36573	0.094011
NM_022036	GPRC5C	1.70367	0.094011
NM_000115	EDNRB	1.66064	0.094011
AI566147	ABCC2	2.59241	0.094011
BC036093	HLF	2.28377	0.094011
NM_003078	SMARCD3	1.97032	0.094011
NM_207644	C22orf36	1.75649	0.094011
CR749338	BDKRB2	1.79698	0.094011
NM_000767	CYP2B6	1.7241	0.094011
NM_024922	CES3	2.88528	0.094011
NM_005218	DEFB1	1.8787	0.094011
NM_003627	SLC43A1	1.80817	0.094011
NM_001024460	VNN3	2.56456	0.094011
NM_002763	PROX1	2.6462	0.094011
AY351902	IQGAP2	2.3695	0.094011
NM_001290	LDB2	1.63596	0.0996001
NM_001756	SERPINA6	1.17573	0.0996001
