# Supplementary material for: Transcriptional Profiling of Breast Cancer Metastases Identifies Liver Metastasis–Selective Genes Associated with Adverse Outcome in Luminal A Primary Breast Cancer
Source: Oxford University Press journal article supplement (doi:10.1158/1078-0432.ccr-15-0487), 2015-08-14
Supplement: 10780432ccr150487-sup-145971_1_supp_3040700_nqr6q6.xlsx [file 10780432ccr150487-sup-145971_1_supp_3040700_nqr6q6.xlsx]

## Sheet: Supplementary table 5
Supplementary table 5. Multivariable Cox proportional hazards analyses for relapse-free survival (RFS) and overall survival (OS) among patients with ER positive primary tumors in GOBO. Separate analyses are shown for all ER positive tumors and the subset of luminal A tumors. P<0.05 was considered significant.
	Relapse-free survival (RFS)							Overall survival (OS)
	All ER Positive tumors			Luminal A tumors				All ER Positive tumors			Luminal A tumors
Factor	HR	CI	P	HR	CI	P		HR	CI	P	HR	CI	P
17-gene signature (low vs high)	1.5	1.2-2.0	0.00130611	2.2	1.3-3.9	0.00443244		1.4	1.0-1.9	0.026	1.4	0.74-2.7	0.29366
Nodal status (Neg vs pos)	0.69	0.52-0.92	0.0118334	0.89	0.47-1.7	0.715968		0.45	0.33-0.63	<0.001	0.5	0.25-1.0	0.0498988
Histological grade (3 vs 1 and 2)	1.1	0.80-1.5	0.608349	0.24	0.03-1.8	0.163301		1.6	1.0-2.1	0.0322985	na	na	na
Age at diagnosis (>50 vs ≤50)	0.78	0.59-1.0	0.079463	0.98	0.52-1.8	0.942883		1.7	1.2-2.3	0.00279072	6.2	1.9-20.5	0.00265903
Tumor size (>20 mm vs ≤20 mm)	2.1	1.6-2.7	<0.001	2.4	1.4-4.3	0.0024109		1.8	1.3-2.5	<0.001	2.3	1.2-4.5	0.012
na; not computed due to very few cases in one group
